# Supplementary material for: Diet Quality According to Mental Status and Associated Factors during Adulthood in Spain
Source: MDPI journal article supplement (doi:10.3390/nu13051727), 2021-05-19
Supplement: s1 [file s1]

Supplementary

# Diet Quality According to Mental Status and Associated Factors during Adulthood in Spain

Jesús Cebrino <sup>1</sup> and Silvia Portero de la Cruz <sup>2,\*</sup>

**Supplementary Table S1.** Criteria to define the score for each item of the Spanish Health Eating Index (SHEI).

| Criteria to define the score for each item of the Spanish Health Eating Index (SHEI) |                                                                                                                                       |                                     |                                   |                                     |                                   |
|--------------------------------------------------------------------------------------|---------------------------------------------------------------------------------------------------------------------------------------|-------------------------------------|-----------------------------------|-------------------------------------|-----------------------------------|
| Variables                                                                            | Criteria for a maximum score of 10                                                                                                    | Criteria for a maximum score of 7.5 | Criteria for a maximum score of 5 | Criteria for a maximum score of 2.5 | Criteria for a maximum score of 0 |
| <i>Daily</i>                                                                         |                                                                                                                                       |                                     |                                   |                                     |                                   |
| Bread/grains                                                                         | Daily                                                                                                                                 | ≥ 3 times a week, but not daily     | 1–2 a week                        | < 1 a week                          | Never or almost never             |
| Vegetables                                                                           | Daily                                                                                                                                 | ≥ 3 times a week, but not daily     | 1–2 a week                        | < 1 a week                          | Never or almost never             |
| Fruit                                                                                | Daily                                                                                                                                 | ≥ 3 times a week, but not daily     | 1–2 a week                        | < 1 a week                          | Never or almost never             |
| Dairy products                                                                       | Daily                                                                                                                                 | ≥ 3 times a week, but not daily     | 1–2 a week                        | < 1 a week                          | Never or almost never             |
| <i>Weekly consumption</i>                                                            |                                                                                                                                       |                                     |                                   |                                     |                                   |
| Meat                                                                                 | 1–2 a week                                                                                                                            | ≥ 3 times a week, but not daily     | < 1 a week                        | Daily                               | Never or almost never             |
| Legumes                                                                              | 1–2 a week                                                                                                                            | ≥ 3 times a week, but not daily     | < 1 a week                        | Daily                               | Never or almost never             |
| <i>Occasional consumption</i>                                                        |                                                                                                                                       |                                     |                                   |                                     |                                   |
| Cold meats and cuts                                                                  | Never or almost never                                                                                                                 | < 1 a week                          | 1–2 a week                        | ≥ 3 times a week, but not daily     | Daily                             |
| Sweets                                                                               | Never or almost never                                                                                                                 | < 1 a week                          | 1–2 a week                        | ≥ 3 times a week, but not daily     | Daily                             |
| Soft drinks with sugar                                                               | Never or almost never                                                                                                                 | < 1 a week                          | 1–2 a week                        | ≥ 3 times a week, but not daily     | Daily                             |
| Variety                                                                              | 2 points if participant achieve each of the daily recommendations, 1 point if participant achieve each of the weekly recommendations. |                                     |                                   |                                     |                                   |

Each item scored from 0 to 10 depending to the criteria of the Spanish Health Eating Index (SHEI) [1], which 10 points means that the recommendations proposed by the Spanish Society of Community Nutrition (SSCN) [2].

## Supplementary references

1. Norte Navarro, A.; Ortiz Moncada, R. Spanish diet quality according to the healthy eating index. *Nutr. Hosp.* **2011**, *26*, 330–336, doi: 10.1590/S0212-16112011000200014.
2. Spanish Society of Community Nutrition (SSCN). Healthy dietary guidelines (2014). Available online: <http://www.nutricioncomunitaria.org/es/otras-publicaciones> (accessed on 13 December 2020).
